# Supplementary material for: Environmental Selection Shapes Bacterial Community Composition in Traditionally Fermented Maize-Based Foods from Benin, Tanzania and Zambia
Source: MDPI journal article supplement (doi:10.3390/microorganisms10071354), 2022-07-05
Supplement: s1 [file s1]

# Supplementary Materials

## *SX Read Quality*

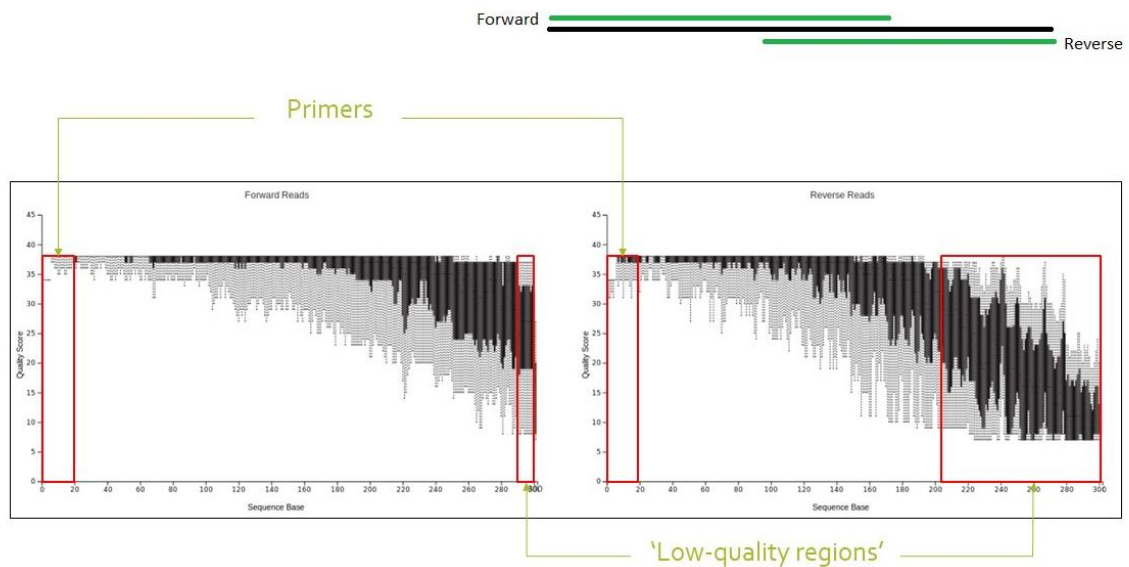

- DADA2 to de-noise sequences and dereplicate those into OTUs

**Figure S1.** Read quality visualization using demux. The left plot represents all forward reads and the right plot all reverse reads. Sequence indices are on the x-axis and corresponding quality on the y-axis. The first 20 basepairs correspond to the primers. The lowest quality regions were on the end of the sequences. Primers and low-quality regions were removed using DADA2.

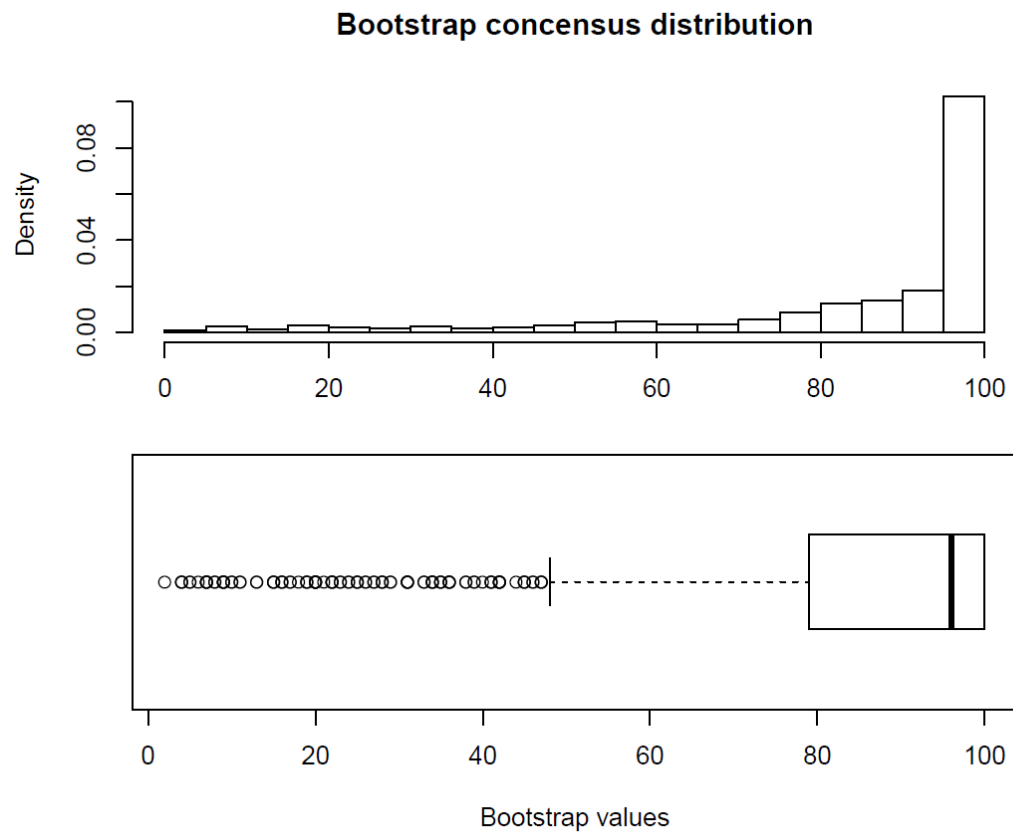

**Figure S2.** Original bootstrap values distribution phylogenetic tree. The 2000 bootstrap replicates of the IQ-Tree phylogenetic trees ranged between 100 and 5% consensus, most observations being above 80%. Splits with bootstrap values below 50% were removed by merging those splits.

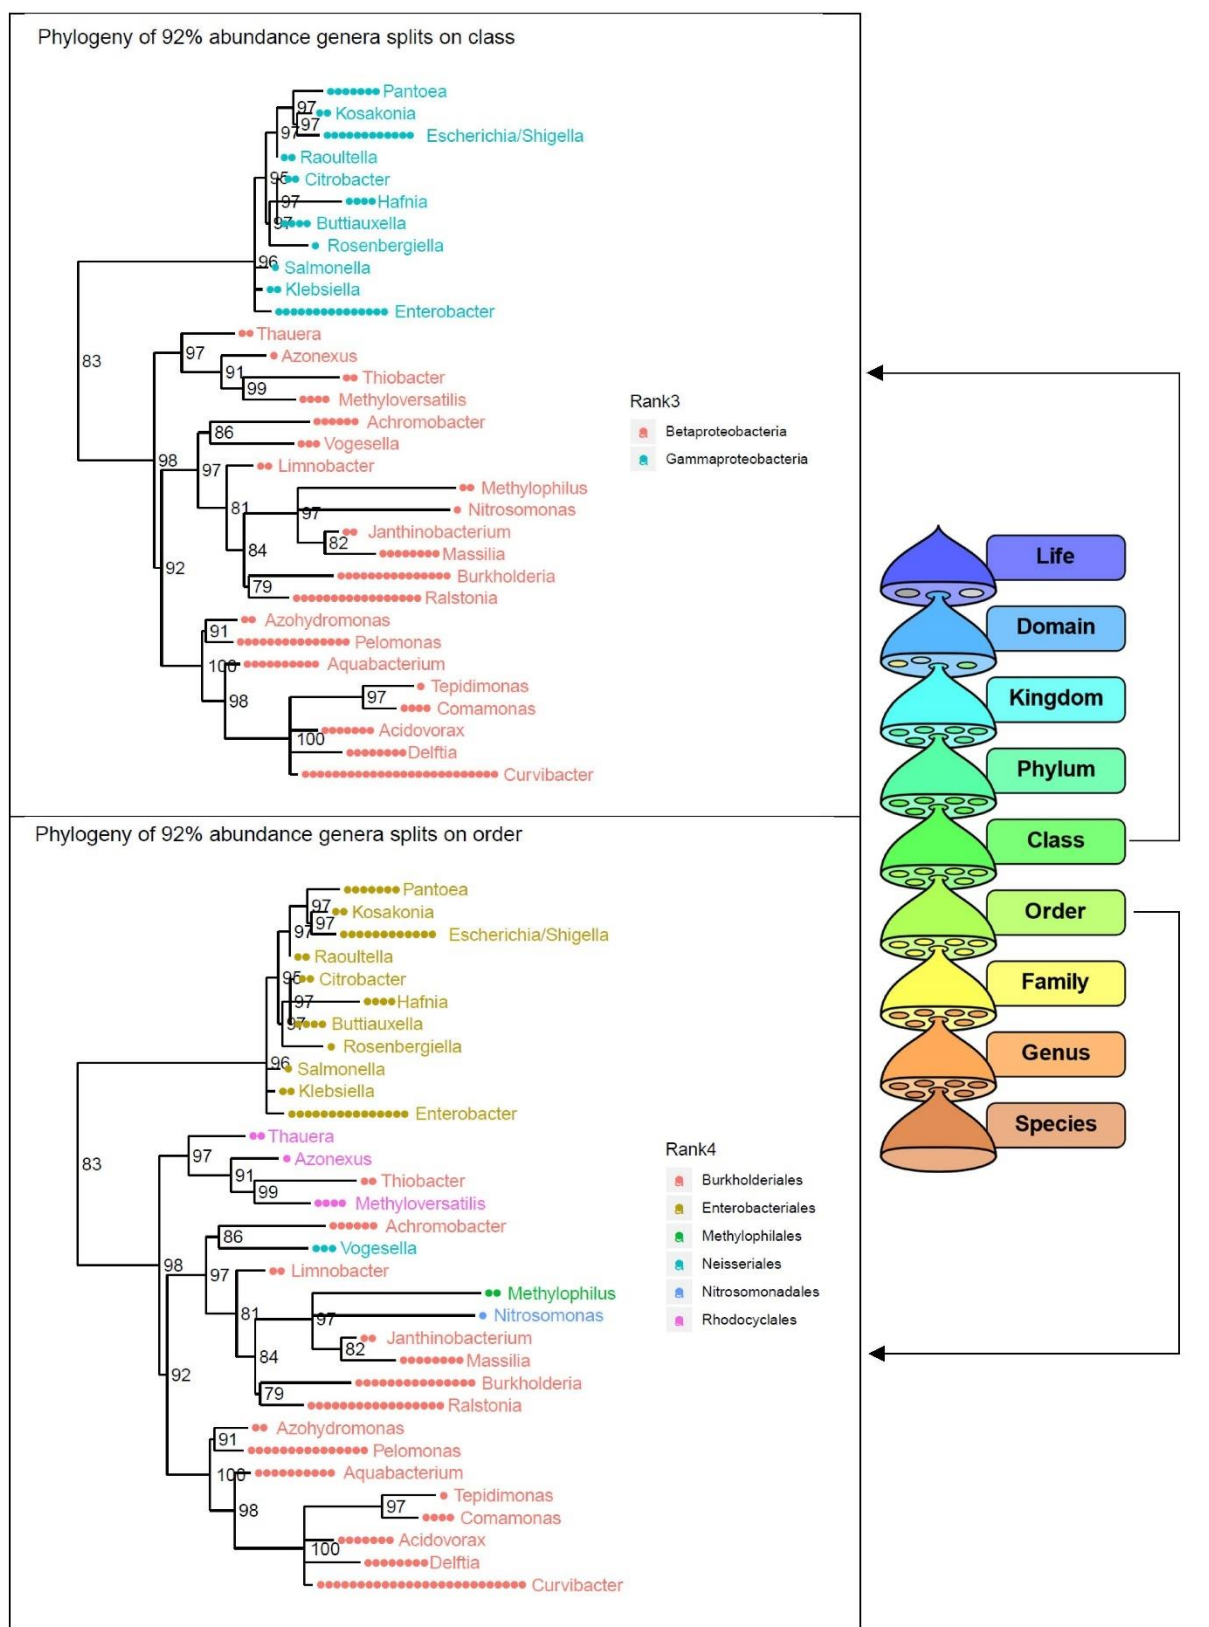

**Figure S3.** Taxonomic classification and phylogenetic inference. The taxonomic classification and phylogenetic inference were obtained independently. The trees on this figure only include the most abundant ASVs. The classes of the ASVs were perfectly split, and the more abundant orders generally agreed with the phylogenetic inference.

**Table S1.** Summary of the sample metadata.

| Sample_ID | Country  | Enzyme_Source          | Main_Ingredient | Mean_Temp_C | Month | Product |
|-----------|----------|------------------------|-----------------|-------------|-------|---------|
| B1        | Benin    | Millet                 | Millet          | 29          | 2     | Aklui   |
| B10       | Benin    | Maize                  | Maize           | 29          | 2     | Akpan   |
| B11       | Benin    | Maize                  | Maize           | 29          | 2     | Mawe    |
| B2        | Benin    | Maize                  | Maize           | 29          | 2     | Aklui   |
| B3        | Benin    | Millet                 | Millet          | 29          | 2     | Mawe    |
| B4        | Benin    | Maize                  | Maize           | 29          | 2     | Akpan   |
| B5        | Benin    | Maize                  | Maize           | 29          | 2     | Akpan   |
| B6        | Benin    | Maize                  | Maize           | 29          | 2     | Mawe    |
| B7        | Benin    | Maize                  | Maize           | 29          | 2     | Mawe    |
| B8        | Benin    | Maize                  | Maize           | 29          | 2     | Akpan   |
| B9        | Benin    | Maize                  | Maize           | 29          | 2     | Akpan   |
| T1        | Tanzania | Millet malt flour      | Maize flour     | 25          | 1     | Togwa   |
| T10       | Tanzania | Millet malt flour      | Maize flour     | 25          | 1     | Togwa   |
| T11       | Tanzania | Millet malt flour      | Maize flour     | 25          | 1     | Togwa   |
| T12       | Tanzania | Millet malt flour      | Maize flour     | 25          | 1     | Togwa   |
| T2        | Tanzania | Millet malt flour      | Maize flour     | 25          | 1     | Togwa   |
| T3        | Tanzania | Millet malt flour      | Maize flour     | 25          | 1     | Togwa   |
| T4        | Tanzania | Millet malt flour      | Maize flour     | 25          | 1     | Togwa   |
| T5        | Tanzania | Millet malt flour      | Maize flour     | 25          | 1     | Togwa   |
| T6        | Tanzania | Millet malt flour      | Maize flour     | 25          | 1     | Togwa   |
| T7        | Tanzania | Millet malt flour      | Maize flour     | 25          | 1     | Togwa   |
| T8        | Tanzania | Millet malt flour      | Maize flour     | 25          | 1     | Togwa   |
| T9        | Tanzania | Millet malt flour      | Maize flour     | 25          | 1     | Togwa   |
| Z1        | Zambia   | Wheat flour            | Maize meal      | 16          | 7     | Munkoyo |
| Z10       | Zambia   | Cowpea flour           | Maize meal      | 16          | 7     | Munkoyo |
| Z11       | Zambia   | <i>Rhynchosia</i> root | Maize meal      | 16          | 7     | Munkoyo |
| Z12       | Zambia   | <i>Rhynchosia</i> root | Maize meal      | 16          | 7     | Munkoyo |
| Z2        | Zambia   | <i>Rhynchosia</i> root | Maize meal      | 16          | 7     | Munkoyo |
| Z3        | Zambia   | Wheat flour            | Maize meal      | 16          | 7     | Munkoyo |
| Z4        | Zambia   | <i>Rhynchosia</i> root | Maize meal      | 16          | 7     | Munkoyo |
| Z5        | Zambia   | Sweet potato peel      | Maize meal      | 16          | 7     | Munkoyo |
| Z6        | Zambia   | <i>Rhynchosia</i> root | Maize meal      | 16          | 7     | Munkoyo |
| Z7        | Zambia   | <i>Rhynchosia</i> root | Maize meal      | 16          | 7     | Munkoyo |
| Z8        | Zambia   | <i>Rhynchosia</i> root | Maize meal      | 16          | 7     | Munkoyo |
| Z9        | Zambia   | Sweet potato peel      | Maize meal      | 16          | 7     | Munkoyo |

**Table S2.** Mann–Whitney U test for different alpha diversity measures. Measures that incorporated the number of ASVs (observed) or an estimate on the number of species (Chao1 and ACE) resulted in significant difference between Benin and the other two countries, whereas measures incorporating number of ASVs and the respective proportions of the ASVs (Shannon and Simpson) resulted in no significant differences between all countries.

| Comparison          | Observed | Shannon  | Simpson  | Chao1    | ACE      |
|---------------------|----------|----------|----------|----------|----------|
| Benin vs. Tanzania  | 0.009543 | 0.406048 | 0.734985 | 0.001692 | 0.001526 |
| Benin vs. Zambia    | 0.001369 | 0.116551 | 0.781814 | 0.000636 | 0.000796 |
| Tanzania vs. Zambia | 0.09364  | 0.260236 | 0.506721 | 0.099877 | 0.088534 |

**Table S3.** Results of PERMANOVA statistical analysis testing differences in amplicon sequence variant richness between samples from all three countries.

|           | Df | SumsOfSqs | MeanSqs  | F.Model  | R2      | Pr (>F) |
|-----------|----|-----------|----------|----------|---------|---------|
| Country   | 2  | 2.709334  | 1.354667 | 3.628282 | 0.18485 | 0.001   |
| Residuals | 32 | 11.94762  | 0.373363 | NA       | 0.81515 | NA      |
| Total     | 34 | 14.65695  | NA       | NA       | 1       | NA      |

**Table S4.** Results of PERMANOVA statistical analysis testing differences in amplicon sequence variant richness between samples from Benin and Tanzania.

|           | Df | SumsOfSqs | MeanSqs  | F.Model  | R2       | Pr (>F) |
|-----------|----|-----------|----------|----------|----------|---------|
| Country   | 1  | 0.674268  | 0.674268 | 1.634406 | 0.072209 | 0.015   |
| Residuals | 21 | 8.663475  | 0.412546 | NA       | 0.927791 | NA      |
| Total     | 22 | 9.337743  | NA       | NA       | 1        | NA      |

**Table S5.** Results of PERMANOVA statistical analysis testing differences in amplicon sequence variant richness between samples from Benin and Zambia.

|           | Df | SumsOfSqs | MeanSqs  | F.Model  | R2       | Pr (>F) |
|-----------|----|-----------|----------|----------|----------|---------|
| Country   | 1  | 1.592925  | 1.592925 | 4.581864 | 0.179106 | 0.001   |
| Residuals | 21 | 7.30083   | 0.347659 | NA       | 0.820894 | NA      |
| Total     | 22 | 8.893755  | NA       | NA       | 1        | NA      |

**Table S6.** Results of PERMANOVA statistical analysis testing differences in amplicon sequence variant richness between samples from Tanzania and Zambia.

|           | Df | SumsOfSqs | MeanSqs  | F.Model  | R2       | Pr (>F) |
|-----------|----|-----------|----------|----------|----------|---------|
| Country   | 1  | 1.778385  | 1.778385 | 4.933148 | 0.183163 | 0.001   |
| Residuals | 22 | 7.930933  | 0.360497 | NA       | 0.816837 | NA      |
| Total     | 23 | 9.709317  | NA       | NA       | 1        | NA      |

**Table S7.** Zambian samples compared based on the presence of root material. No significant difference was found between samples with added root material and those without one.

|           | Df | SumsOfSqs | MeanSqs  | F.Model  | R2       | Pr (>F) |
|-----------|----|-----------|----------|----------|----------|---------|
| Root      | 1  | 0.333095  | 0.333095 | 0.897866 | 0.082389 | 0.593   |
| Residuals | 10 | 3.709854  | 0.370985 | NA       | 0.917611 | NA      |
| Total     | 11 | 4.042949  | NA       | NA       | 1        | NA      |

In tables S3–S7, Df represents degrees of freedom; SumsOfSqs represents the sum of squares. MeanSqs is the mean square error, calculated as SumsOfSqs/Df. F.Model represents the F test value. R2 represents the explanatory degree of different groups to sample differences, calculated as the ratio of group variance to total variance. Pr(>F) represents  $p$ -value, where  $p < 0.05$  indicates that there is a statistically significant difference in this grouping level.
